# Supplementary material for: Workplace interventions that aim to improve employee health and well-being in male-dominated industries: a systematic review
Source: HighWire-hosted journal article supplement (doi:10.1136/oemed-2020-107314), 2021-05-25
Supplement: oemed-2020-107314supp001_data_supplement.pdf [file oemed-2020-107314supp001_data_supplement.pdf]

Online Supplementary Figure 1: Search Strategy

| ▼ Search History (26)    |     |                                                                   |         |          | View Saved               |                          |
|--------------------------|-----|-------------------------------------------------------------------|---------|----------|--------------------------|--------------------------|
| <input type="checkbox"/> | # ▲ | Searches                                                          | Results | Type     | Actions                  | Annotations              |
| <input type="checkbox"/> | 1   | male-dominated industr*.tw.                                       | 23      | Advanced | Display Results   More ▼ | <input type="checkbox"/> |
| <input type="checkbox"/> | 2   | building industr*/                                                | 3401    | Advanced | Display Results   More ▼ | <input type="checkbox"/> |
| <input type="checkbox"/> | 3   | construction industr*.tw.                                         | 1758    | Advanced | Display Results   More ▼ | <input type="checkbox"/> |
| <input type="checkbox"/> | 4   | manufacturing industr*/                                           | 1835    | Advanced | Display Results   More ▼ | <input type="checkbox"/> |
| <input type="checkbox"/> | 5   | exp coal mining/ or mining/                                       | 19074   | Advanced | Display Results   More ▼ | <input type="checkbox"/> |
| <input type="checkbox"/> | 6   | agriculture/                                                      | 44228   | Advanced | Display Results   More ▼ | <input type="checkbox"/> |
| <input type="checkbox"/> | 7   | agriculture industr*.tw.                                          | 359     | Advanced | Display Results   More ▼ | <input type="checkbox"/> |
| <input type="checkbox"/> | 8   | transport industr*.tw.                                            | 143     | Advanced | Display Results   More ▼ | <input type="checkbox"/> |
| <input type="checkbox"/> | 9   | information technology/                                           | 11019   | Advanced | Display Results   More ▼ | <input type="checkbox"/> |
| <input type="checkbox"/> | 10  | manufacturing industr*.tw.                                        | 1834    | Advanced | Display Results   More ▼ | <input type="checkbox"/> |
| <input type="checkbox"/> | 11  | mining industr*.tw.                                               | 1120    | Advanced | Display Results   More ▼ | <input type="checkbox"/> |
| <input type="checkbox"/> | 12  | information technology industr*.tw.                               | 44      | Advanced | Display Results   More ▼ | <input type="checkbox"/> |
| <input type="checkbox"/> | 13  | IT industr*.tw.                                                   | 111     | Advanced | Display Results   More ▼ | <input type="checkbox"/> |
| <input type="checkbox"/> | 14  | 1 or 2 or 3 or 4 or 5 or 6 or 7 or 8 or 9 or 10 or 11 or 12 or 13 | 82215   | Advanced | Display Results   More ▼ | <input type="checkbox"/> |
| <input type="checkbox"/> | 15  | workplace/                                                        | 43181   | Advanced | Display Results   More ▼ | <input type="checkbox"/> |
| <input type="checkbox"/> | 16  | workplace intervention*.tw.                                       | 870     | Advanced | Display Results   More ▼ | <input type="checkbox"/> |
| <input type="checkbox"/> | 17  | office*.tw.                                                       | 110778  | Advanced | Display Results   More ▼ | <input type="checkbox"/> |
| <input type="checkbox"/> | 18  | workplace program*.tw.                                            | 206     | Advanced | Display Results   More ▼ | <input type="checkbox"/> |
| <input type="checkbox"/> | 19  | 15 or 16 or 17 or 18                                              | 158415  | Advanced | Display Results   More ▼ | <input type="checkbox"/> |
| <input type="checkbox"/> | 20  | body mass/                                                        | 453382  | Advanced | Display Results   More ▼ | <input type="checkbox"/> |
| <input type="checkbox"/> | 21  | body mass index.tw.                                               | 273514  | Advanced | Display Results   More ▼ | <input type="checkbox"/> |
| <input type="checkbox"/> | 22  | diet.tw.                                                          | 414776  | Advanced | Display Results   More ▼ | <input type="checkbox"/> |
| <input type="checkbox"/> | 23  | exercise.tw.                                                      | 342001  | Advanced | Display Results   More ▼ | <input type="checkbox"/> |
| <input type="checkbox"/> | 24  | fitness.tw.                                                       | 83568   | Advanced | Display Results   More ▼ | <input type="checkbox"/> |
| <input type="checkbox"/> | 25  | 20 or 21 or 22 or 23 or 24                                        | 1229510 | Advanced | Display Results   More ▼ | <input type="checkbox"/> |
| <input type="checkbox"/> | 26  | 14 and 19 and 25                                                  | 73      | Advanced | Display Results   More ▼ | <input type="checkbox"/> |

Online Supplementary Figure 2: Forest plot of the effectiveness of workplace interventions on participant’s diastolic blood pressure for all studies

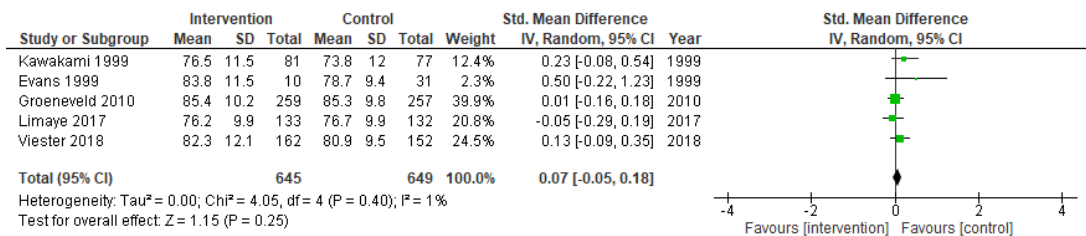

Online Supplementary Figure 3: Forest plot of the effectiveness of workplace interventions on participant’s systolic blood pressure for all studies

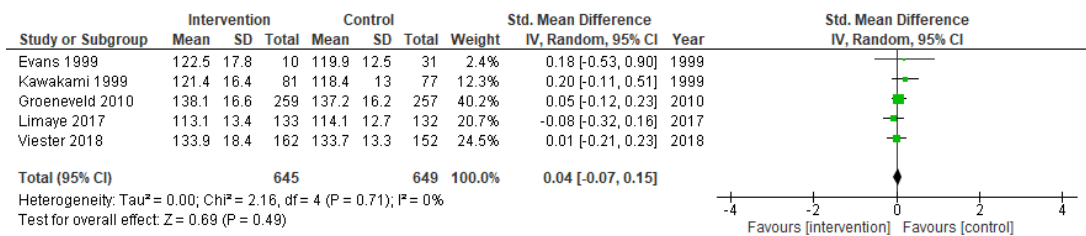

Online Supplementary Figure 4: Forest plot of the effectiveness of workplace interventions on participant’s BMI for all studies

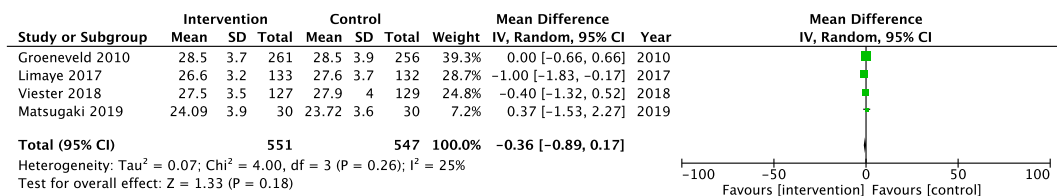

Online Supplementary Figure 5: Albatross plot for studies identified as low risk of bias

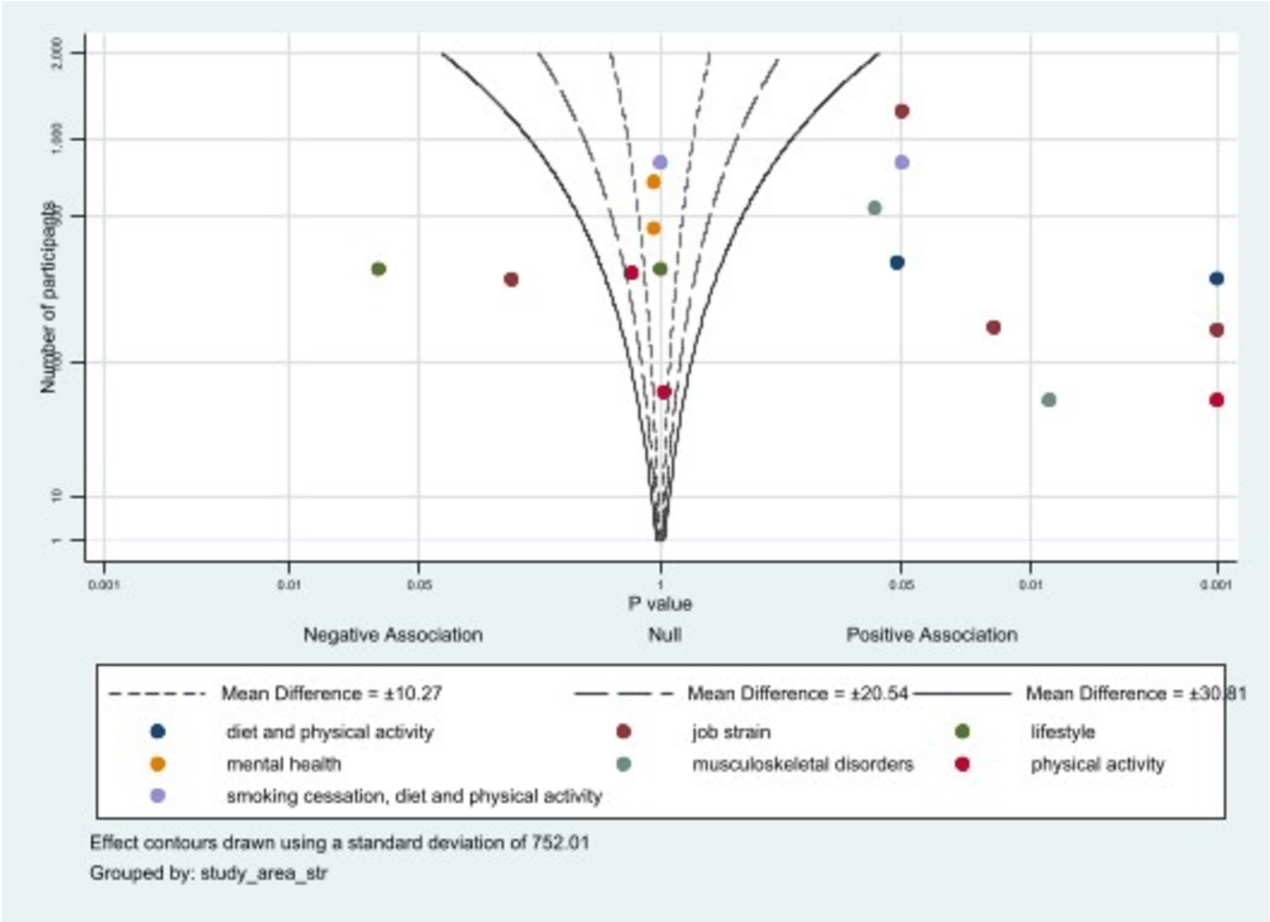

Online Supplementary Figure 6: Forest plot of the effectiveness of workplace intervention on participant’s diastolic blood pressure for studies identified as low risk of bias

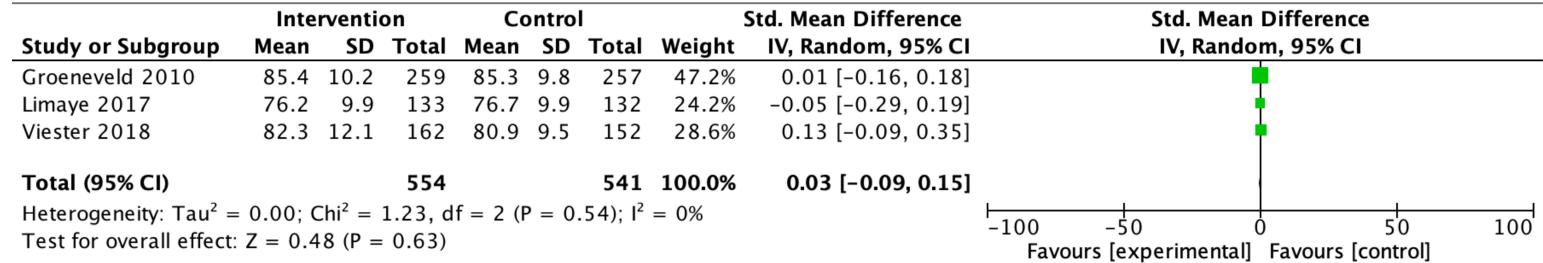

Online Supplementary Figure 7: Forest plot of the effectiveness of workplace intervention on participant’s systolic blood pressure for studies identified as low risk of bias

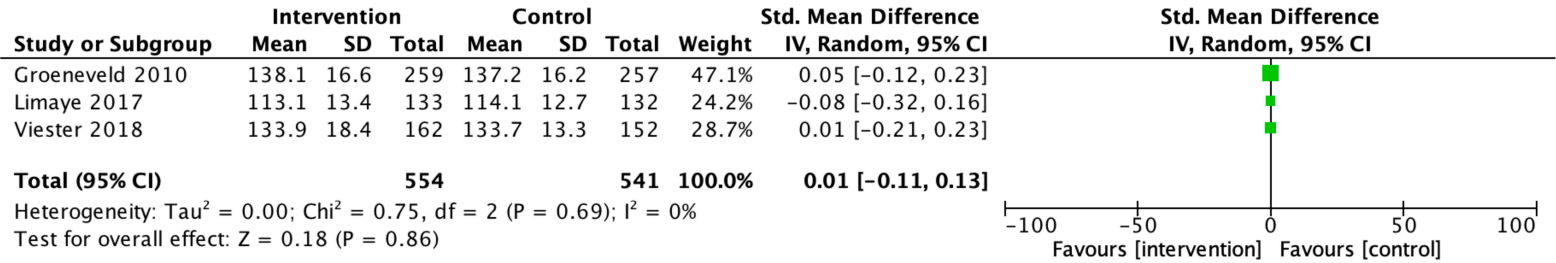

**Online Supplementary Table 1: Summary of findings from included studies aiming to improve employee health and wellbeing in male-dominated industries**

| Author/Year               | Main findings                                                                                                                                                                                                                                                                                                                                                                                                                                                                                                       |
|---------------------------|---------------------------------------------------------------------------------------------------------------------------------------------------------------------------------------------------------------------------------------------------------------------------------------------------------------------------------------------------------------------------------------------------------------------------------------------------------------------------------------------------------------------|
| Anderson, et al., (1999)  | Differences between the three groups for fruit and vegetables (servings/day) and fat and fibre (grams/day) were not statistically significant. The control group had a lower intake of high-fat meat items versus intervention groups at 12-month follow up ( $p=0.03$ ). Attitudinal changes towards less fat were important and less fat decreases cholesterol post-intervention ( $p<0.05$ ).                                                                                                                    |
| Blake, et al., (2019)     | In both intervention and control group, participant's physical activity increased significantly from baseline to post-intervention ( $p<0.05$ ). However, there was a non-significant difference in the changes between the groups ( $p=0.70$ ). The difference in changes in sitting hours was statistically significant between intervention and control group ( $p<0.01$ ).                                                                                                                                      |
| Braeckman, et al., (1999) | The nutrition programme significantly reduced reported total energy ( $p<0.05$ ; 95% CI: -276–8.83) and total fat intake ( $p<0.05$ ; 95% CI: -2.98–0.13) in the intervention group. Whilst there were no changes for the percentage of energy from saturated or mono-unsaturated fat, the intake of carbohydrates ( $p<0.05$ ; 95% CI: 0.51–2.18) and proteins ( $p<0.05$ ; 95% CI: 0.161–1.43) increased. Nutrition knowledge significantly increased in the intervention group ( $p<0.001$ ; 95% CI: 1.09–1.59). |
| Evans, et al., (1999)     | Changes in job hassles were significantly correlated to changes in systolic blood pressure ( $p<0.05$ ), heart rate ( $p<0.05$ ), and perceived stress ( $p<0.01$ ), but not diastolic blood pressure change. Control group experienced little or no changes in job hassles or stress outcomes over the same time period, except for systolic blood pressure ( $p<0.025$ ).                                                                                                                                         |
| Faude, et al., (2015)     | There was a group x time interaction for postural sway ( $p=0.02$ ) with a reduction in the intervention group, but no relevant change in the control group ( $p<0.001$ ). A group x time interaction ( $p=0.047$ ) was found for the number of successful steps while walking backwards on the 3cm-wide beam ( $p<0.001$ ) but was not significant for the 4.5cm-wide beam ( $p=0.44$ ). There was no significant difference between intervention and control groups for jump height ( $p=0.50$ ).                 |

|                            |                                                                                                                                                                                                                                                                                                                                                                                                                                                                                                                                                            |
|----------------------------|------------------------------------------------------------------------------------------------------------------------------------------------------------------------------------------------------------------------------------------------------------------------------------------------------------------------------------------------------------------------------------------------------------------------------------------------------------------------------------------------------------------------------------------------------------|
| Gram, et al., (2012)       | No significant changes were found in musculoskeletal pain in neck-shoulder dominant ( $p=0.90$ ), low back ( $p=0.66$ ) and hip to knee ( $p=0.77$ ), work ability ( $p=0.21$ ), productivity ( $p=0.28$ ), perceived physical exertion ( $p=0.74$ ) and sick leave (0.91) in the intervention group.                                                                                                                                                                                                                                                      |
| Gram, et al., (2012)       | There was a significant difference in the estimated change in $VO_{2max}$ of 0.4 l/min in the intervention group and 0.01 l/min for the control group ( $p<0.001$ ), as well as in heart rate at a steady rate ( $p<0.001$ ). There were no significant changes in BMI ( $p=0.55$ ), fat percentage ( $p=0.37$ ), systolic blood pressure ( $p=0.77$ ), diastolic blood pressure ( $p=0.51$ ), total cholesterol ( $p=0.56$ ) or triglyceride levels ( $p=0.80$ ).                                                                                         |
| Groeneveld, et al., (2011) | For snack and fruit intake, there was a statistically significant positive effect; $\beta$ -1.9 (95% CI: -3.7--0.02) and $\beta$ 1.7 (95% CI: 0.6--2.9), respectively. For snack intake, the effect was sustained at 12 months; $\beta$ -1.9 (95% CI: -3.6--0.02). For leisure time PA, the intervention was not statistically significant. At 6 months, the beneficial effect on smoking, was statistically significant; OR smoking 0.3 (95% CI: 0.1--0.7), but not at 12 months; OR 0.8 (95% CI: 0.4--1.6).                                              |
| Groeneveld, et al., (2010) | In the intervention group, body weight significantly decreased at 6 and 12 months; $\beta$ -1.9; 95% CI: -2.6--1.2 and $\beta$ -1.8; 95% CI: -2.8--1.1, respectively. At 12 months, the intervention group had lost an average 1.4kg of body weight, whilst the control group had gained 0.8kg. There was also a significant change in diastolic blood pressure at 6 months; $\beta$ -1.7; 95% CI: -3.3--0.1. BMI modified the intervention effects on body weight, systolic blood pressure and HDL cholesterol, with the effects largest among the obese. |
| Gupta, et al., (2018)      | No statistically significant overall effects on any of the outcomes were found; need for recovery ( $p=0.06$ ), work ability ( $p=0.25$ ), productivity ( $p=0.88$ ), physical exertion at work ( $p=0.15$ ), physical demands ( $p=0.78$ ), physical resources ( $p=0.89$ ), well-being index ( $p=0.60$ ), mental health ( $p=0.79$ ). There was a tendency towards an overall increased poor recovery in the intervention group, which was significant at 10- and 12-month follow-up.                                                                   |
| Hammer, et al., (2015)     | For safety participation and safety compliance, mean scores were not significantly higher at 12-months in the intervention group; $\beta=0.14$ ( $p=0.12$ ) and $\beta=-0.02$ ( $p=0.83$ ), respectively. Mean blood pressure was significantly lower at 12-months, controlling for baseline blood pressure, age and use of medication; $\beta=-$                                                                                                                                                                                                          |

|                           |                                                                                                                                                                                                                                                                                                                                                                                                                                                                                                                                                                                             |
|---------------------------|---------------------------------------------------------------------------------------------------------------------------------------------------------------------------------------------------------------------------------------------------------------------------------------------------------------------------------------------------------------------------------------------------------------------------------------------------------------------------------------------------------------------------------------------------------------------------------------------|
|                           | 2.15, $p=0.038$ . There was no significant difference for mean SF-12 physical health scores between intervention and control group; $\beta=-0.32$ , $p=0.069$ .                                                                                                                                                                                                                                                                                                                                                                                                                             |
| Holmstrom, et al., (2005) | Thoracic and trunk flexion increased significantly in the intervention group post-intervention ( $p<0.001$ ) and decreased in the control group. The stretch ability in the left and right hamstring muscles increased significantly ( $p<0.001$ ) as well as in the left and right hip flexors ( $p<0.01$ ). There were no significant changes in the intervention group for relative segmental flexion mobility in the cervico-thoracic spine.                                                                                                                                            |
| Kang, et al., (2018)      | In the unstable surface group, VAS, ODI and BDI scores significantly decreased ( $p<0.01$ ) whilst strength and stability significantly increased ( $p<0.01$ ). In the stable surface group, VAS scores significantly decreased ( $p<0.01$ ) and stability, ODI and BDI scores were significantly increased ( $p<0.01$ ). Between the two groups, there were significant differences in the VAS, ODI and BDI scores as well as strength and stability ( $p<0.01$ ).                                                                                                                         |
| Kawakami, et al., (1999)  | Intervention effect on GHQ score was not significant ( $p=0.164$ ), although the scores significantly decreased in both the intervention and control group at follow-up versus baseline ( $p<0.001$ ). Intervention effect was not significant for systolic ( $p=0.933$ ) or diastolic blood pressure ( $p=0.314$ ), total serum cholesterol ( $p=0.234$ ) or serum triglycerides ( $p=0.488$ ). There was no significant effect on sick leave, leisure-time physical activity or green vegetable intake. The intervention was significant for regular breakfast consumption ( $p=0.091$ ). |
| Kobayashi, et al., (2008) | For men, a significant beneficial intervention effect was observed for poor physical work environment ( $p=0.075$ ). For women, a beneficial intervention effect was observed for skill underutilization, supervisor, and co-worker support, and job satisfaction ( $p<0.05$ ). For both genders, no intervention effect was found for sick leave ( $p<0.05$ ).                                                                                                                                                                                                                             |
| Limaye, et al., (2017)    | At 6 months, the intervention group had significantly greater reductions in weight ( $p<0.001$ ), waist circumference ( $p<0.001$ ), systolic blood pressure ( $p=0.012$ ), diastolic blood pressure ( $p=0.033$ ). Improvements were sustained at one year, except for systolic and diastolic blood pressure. At 12 months, the prevalence of overweight/obesity in the experimental group decreased by 6.0% and increased in the control group by 6.8% (RD 11.2%; 95% CI; 1.2–21.1; $p=0.04$ ). 98% of participants                                                                       |

|                           |                                                                                                                                                                                                                                                                                                                                                                                                                                                                                                                                                             |
|---------------------------|-------------------------------------------------------------------------------------------------------------------------------------------------------------------------------------------------------------------------------------------------------------------------------------------------------------------------------------------------------------------------------------------------------------------------------------------------------------------------------------------------------------------------------------------------------------|
|                           | continued to use the virtual assistance and 96% would recommend the intervention to family and friends.                                                                                                                                                                                                                                                                                                                                                                                                                                                     |
| Limm, et al., (2011)      | Reduction in perceived stress reactivity in the intervention group was significantly higher than in the control group; 54.5 to 50.2 and 54.5 to 52.7, respectively ( $f=5.932$ ; $p=0.016$ ). No significant group x time effects were found for depression ( $d=0.262$ ; 95%CI: -0.068 to 0.592 and $d=0.107$ ; 95%CI: -0.209 to 0.423) and anxiety ( $d=0.194$ ; 95%CI: -0.134 to 0.522 and $d=0.209$ ; 95%CI: -0.109 to 0.527) between intervention and control groups, respectively. No intervention effect was observed in cortisol analyses.          |
| Maes, et al., (1998)      | No statistically significant effects over time were found on lifestyle variables. There were no significant differences found between the experimental and control for general stress reactions, but there was a significant difference between groups in perceived psychological demands over time ( $p<0.01$ ). The intervention did not lead to significant changes over time regarding social support from supervisors and colleagues. Post intervention, absenteeism in the experimental group had decreased to 7.7% versus 9.5% in the control group. |
| Matsugaki, et al., (2019) | In both groups, the chair stand test improved significantly ( $p<0.001$ ) following the intervention. In comparison to the control group, the intervention group had significant greater improvement in chair stand results ( $p<0.001$ ). Grip strength also increased and had a significant effect observed in the intervention group ( $p=0.019$ ).                                                                                                                                                                                                      |
| McCraty, et al., (2003)   | Intervention group had a means adjusted reduction of 10.6mmHg in systolic blood pressure and 6.3mmHg in diastolic blood pressure; reduction in systolic blood pressure was significant ( $p<0.05$ ). Intervention group also had significant increases in positive outlook ( $p<0.01$ ), peacefulness ( $p<0.05$ ) and stress symptoms ( $p<0.05$ ) via the POQA.                                                                                                                                                                                           |
| Milner, et al., (2018)    | There was no significant effect on self-stigma in the intervention group. For help-seeking inhibition, shame and self-blame, there was a non-significant reduction in the intervention group at six weeks - 0.03 (95% CI: -0.74–0.68), -0.19 (95% CI: -0.96–0.58) and -0.06 (95% CI: -0.50–0.39), respectively. Process evaluation suggest that participants enjoyed the program and beneficial to their mental health.                                                                                                                                     |



|                                 |                                                                                                                                                                                                                                                                                                                                                                                                                        |
|---------------------------------|------------------------------------------------------------------------------------------------------------------------------------------------------------------------------------------------------------------------------------------------------------------------------------------------------------------------------------------------------------------------------------------------------------------------|
| Milner, et al., (2020)          | The intervention had no significant effect on suicidal thoughts ( $p=0.420$ ), communication (0.056) or suicide attempts ( $p=0.692$ ).                                                                                                                                                                                                                                                                                |
| Molek-Winiarska, et al., (2018) | In the intervention group, there was a significant increase in decision latitude ( $f=17.36$ ; $p<0.001$ ) and social support (supervisor $f=9.00$ ; $p<0.004$ and co-worker $f=5.61$ ; $p<0.020$ ) via the JCQ. For the GHQ-28, there was a significant intervention decrease effect in anxiety ( $f=5.28$ ; $p<0.079$ ) and depression ( $f=3.95$ ; $p<0.048$ ).                                                     |
| Muñoz-Poblete, et al., (2019)   | The intervention had a protective effect on perceived pain intensity in upper limbs (RR: 0.62, 95% CI 0.44-0.87). There was a significant improvement in difficulty in performing work ( $p=0.041$ ), difficulty in performing work as well as you would wish ( $p=0.021$ ) and everyday functional difficulties in the last week ( $p=0.018$ ).                                                                       |
| Muyor, et al., (2012)           | There was a significant increase in toe-touch score ( $p<0.01$ ) and straight leg raise angle in both legs ( $p<0.01$ ). There weren't any significant changes found in the standing postures in either experimental or control groups. There was a significant decrease in thoracic curve and significant increase in pelvic inclination were found in the toe-touch test within the experimental group ( $p<0.05$ ). |
| Nakao, et al., (2007)           | There was a significant intervention decrease effect in total HAM-D scores ( $p=0.0011$ ) and individual scores of HAM-D items (suicidal thoughts, agitation, psychomotor retardation, guilt and depressed mood). There were no significant changes in JCQ scores (demand, control and support) from baseline to follow-up for both groups (all $p>0.05$ ).                                                            |
| Nishinoue, et al., (2012)       | The average PSQI score of both groups significantly decreased and the intervention group decreased significantly more than the control group; 1.7 versus 0.3, respectively. The change in the proportion of workers with PSQI scores of poor sleep quality decreased by 23.3% in the intervention group and 11.5% in the control group; the difference between the groups was significant ( $p=0.08$ ).                |
| Oude Hengel, et al., (2012)     | There were no differences found between intervention and control groups in work engagement ( $\beta 0.02$ ; 95% CI: -0.12–0.15), social support at work ( $\beta 0.03$ ; 95% CI: -0.39–0.46) and need for recovery (OR 1.17;                                                                                                                                                                                           |

|                             |                                                                                                                                                                                                                                                                                                                                                                                                                                                                                        |
|-----------------------------|----------------------------------------------------------------------------------------------------------------------------------------------------------------------------------------------------------------------------------------------------------------------------------------------------------------------------------------------------------------------------------------------------------------------------------------------------------------------------------------|
|                             | 95% CI: 0.66–2.07). However, at 6 months, the control group reported a small but significant reduction of physical workload ( $\beta$ 0.18; 95% CI: 0.01–0.34).                                                                                                                                                                                                                                                                                                                        |
| Oude Hengel, et al., (2013) | There were no differences found between intervention and control groups in work ability ( $\beta$ 0.02, 95% CI: -0.3–0.37), physical health status ( $\beta$ 0.04, 95% CI: -1.43–1.35) and mental health status ( $\beta$ 0.80, 95% CI: -0.51–2.11). There were declines in musculoskeletal symptoms (from OR 0.68, 95% CI: 0.34 –1.33 to OR: 0.86, 95% CI: 0.47 – 1.57) and long-term sick leave (OR 0.44, 95% CI: 0.13–1.26), but both decreases were not statistically significant. |
| Pidd, et al., (2018)        | No significant intervention effect was observed for risky drinking, but there was a significantly increased awareness of alcohol policy and alcohol assistance in the intervention group; $p=0.001$ and $p=0.01$ , respectively. At 24 months post-intervention in comparison to the control group, for the intervention group the odds of being aware of workplace policy were 48.9% (95% CI: 29.3–88.9%) and for employee assistance were 79.7% (95% CI: 11.5–91.8%).                |
| Rasotto, et al., (2015)     | In the intervention group, there was a reduction in shoulder pain ( $p=0.007$ ), as well as increases in handgrip strength ( $p=0.013$ ) and back scratch ( $p=0.014$ ) scores. There were also improvements in a range of movements including: shoulder flexibility ( $p=0.008$ ), shoulder elevation ( $p=0.035$ ), shoulder abduction ( $p=0.003$ ), lateral inclination ( $p<0.001$ ) and rotation of the head ( $p=0.002$ ).                                                      |
| Umanodan, et al., (2009)    | A beneficial intervention effect was found on knowledge about stress ( $f=32.929$ , $p<0.001$ ) and professional efficacy ( $f=3.246$ ; $p=0.074$ ). For three items on the professional efficacy scale; 'I can solve problems', 'I feel I am making an effective contribution' and 'I am confident at my work', there was a favourable significant effect, however, there was no intervention effects on psychological distress, physical complaints or job performance ( $p>0.05$ ). |
| Umanodan, et al., (2014)    | There was a statistically significant group x time interaction on knowledge about stress management ( $f=6.028$ ; $p=0.003$ ). Knowledge scores significant increased from baseline to 9 weeks in the intervention group ( $p<0.001$ ) and significantly decrease from baseline to 19 weeks in the control group ( $p=0.023$ ). There were small intervention effects on other primary or secondary outcomes at 9 and 19 weeks, but                                                    |

|                         |                                                                                                                                                                                                                                                                                                                                                                                                                                                                                                                                                                                                        |
|-------------------------|--------------------------------------------------------------------------------------------------------------------------------------------------------------------------------------------------------------------------------------------------------------------------------------------------------------------------------------------------------------------------------------------------------------------------------------------------------------------------------------------------------------------------------------------------------------------------------------------------------|
|                         | not statistically significant. 40% of intervention group completed the program in one or two days, instead of one per week.                                                                                                                                                                                                                                                                                                                                                                                                                                                                            |
| Viestar, et al., (2018) | At 6 months, there was a statistically significant intervention effect on body weight $\beta$ -1.06 (95% CI: -1.87—-0.26; $p=0.01$ ), BMI $\beta$ -0.32 (95% CI:-0.57—-0.08; $p=0.01$ ) and waist circumference $\beta$ -1.38 (95% CI: -2.63—-0.12; $p=0.03$ ), but at 12 months these differences were not statistically significant. At 6 months, there was a significant increase in the percentage within the intervention group meeting public health guidelines for vigorous PA (OR 2.06, 95% CI: 1.07—3.99) and a decrease for sugar-sweetened beverages ( $\beta$ -2.82, 95% CI: -4.67—-0.97). |
| Zebis, et al., (2011)   | There was a significant decrease in neck pain intensity in the intervention group versus control group (-0.6; 95% CI: -1.0—-0.1) as well as decreases in shoulder pain intensity (-0.2; 95% CI: -0.5—-0.1).                                                                                                                                                                                                                                                                                                                                                                                            |

Beck Depression Inventory (**BDI**); Body Mass Index (**BMI**); General Health Questionnaire (**GHQ**); General Health Questionnaire – 28 version (**GHQ-28**); Hamilton Depression Rating Scale (**HAM-D**); High Density Lipoprotein (**HDL**); Job Content Questionnaire (**JCQ**); Oswestry Disability Index (**ODI**); Personal and Organisational Quality Assessment (**POQA**); Physical Activity (**PA**); Pittsburgh Sleep Quality Index (**PSQI**); Risk Difference (**RD**); Short Form Questionnaire – 12 version (**SF-12**); Visual Analog Scale (**VAS**)
